# Supplementary material for: Novel Interaction Mechanism of a Domain Antibody-based Inhibitor of Human Vascular Endothelial Growth Factor with Greater Potency than Ranibizumab and Bevacizumab and Improved Capacity over Aflibercept
Source: PubMed Central journal article supplement (PMC4786692; doi:10.1074/jbc.m115.691162), 2016-01-04
Supplement: 10.1074_M115.691162_jbc.M115.691162-1.pdf [file 10.1074_M115.691162_jbc.M115.691162-1.pdf]

**Novel interaction mechanism of a domain antibody based inhibitor of human vascular endothelial growth factor with greater potency than ranibizumab and bevacizumab and improved capacity over aflibercept.**

Adam Walker<sup>1</sup>, Chun-wa Chung<sup>2</sup>, Margaret Neu<sup>2</sup>, Manish Burman<sup>1</sup>, Thil Batuwangala<sup>1</sup>, Gavin Jones<sup>1</sup>, Chi-Man Tang<sup>1\*</sup>, Michael Steward<sup>1</sup>, Michael Mullin<sup>3</sup>, Nadia Tournier<sup>3</sup>, Alan Lewis<sup>3</sup>, Justyna Korczynska<sup>1,3</sup>, Vicky Chung<sup>4</sup>, Ian Catchpole<sup>1#</sup>

**SUPPLEMENTAL DATA.**

**SI Figure 1:** Sample electron density maps of the V<sub>k</sub> dAb/VEGF-107 interaction, (A) V<sub>k</sub> dAb L chain and (B) M chain and V<sub>H</sub> dAb/VEGF-107 complexes, (C) V<sub>H</sub> dAb L chain and (D) M chain.

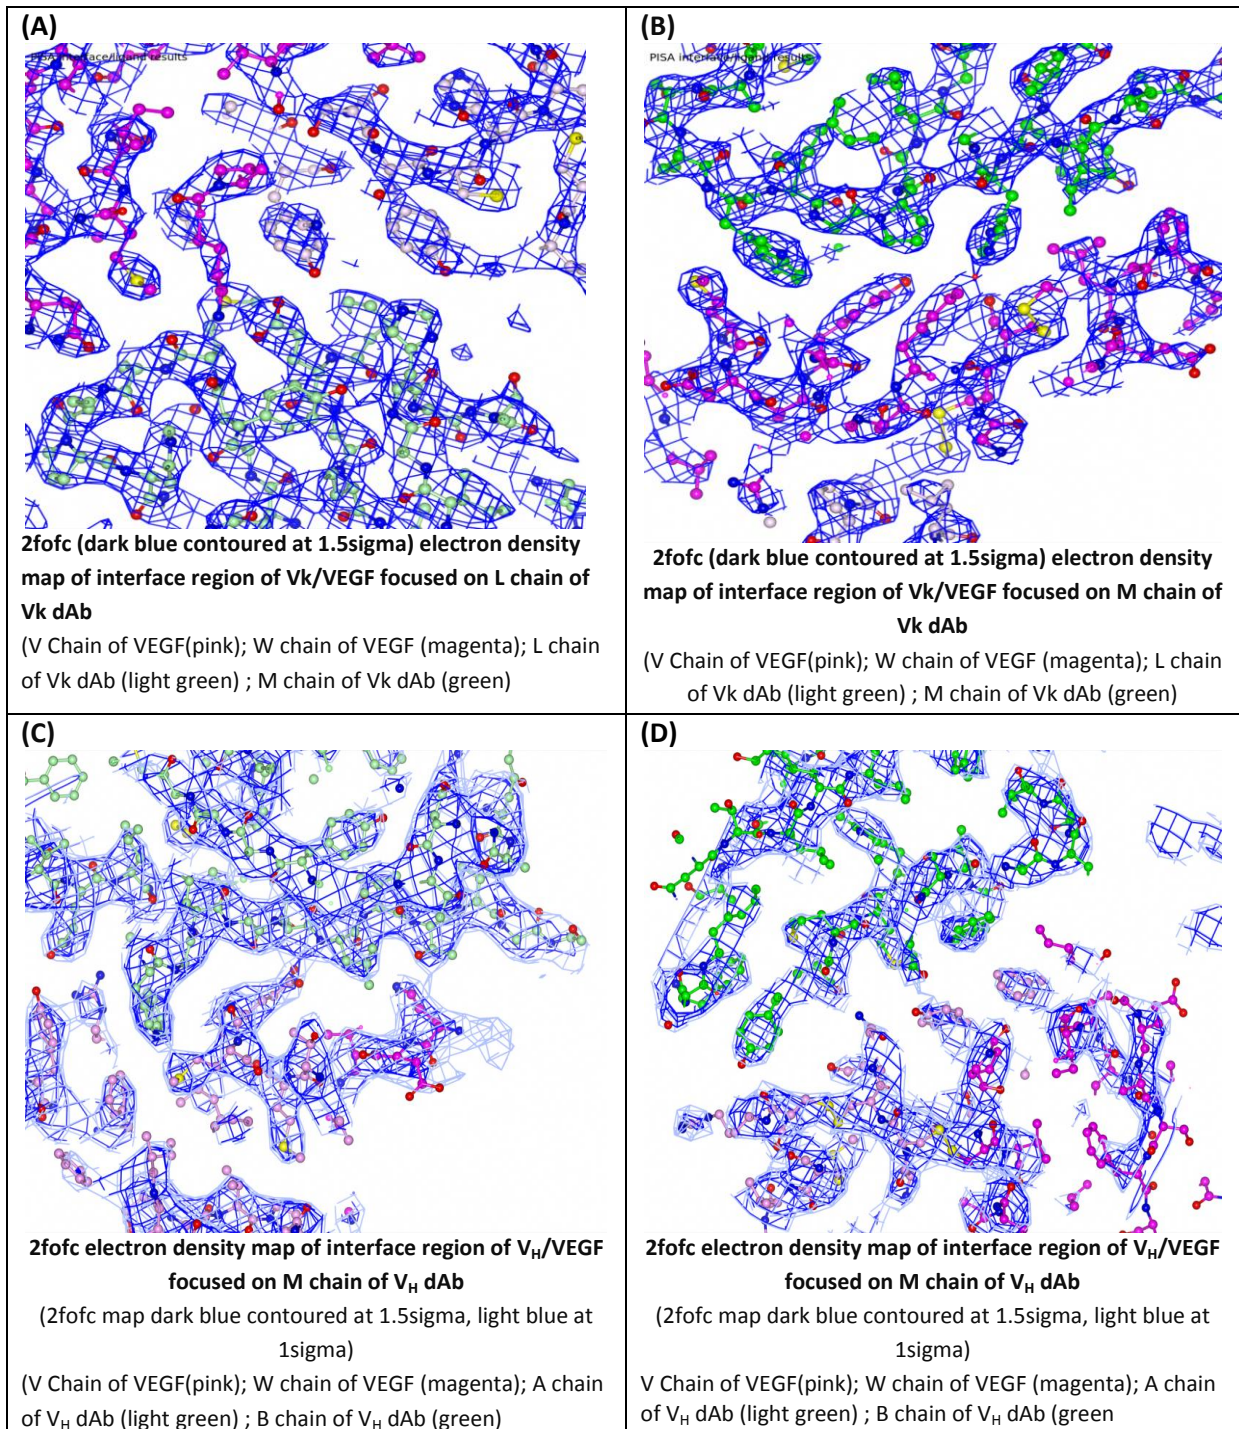

**SI Table 1: Statistics for Xray data collection and refinement**

| (collection on a single crystal)                    | V <sub>K</sub> dAb: VEGF | V <sub>H</sub> dAb: VEGF |
|-----------------------------------------------------|--------------------------|--------------------------|
| <b>Data collection *</b>                            |                          |                          |
| Space group                                         | I222                     | C2                       |
| Cell dimensions                                     |                          |                          |
| <i>a, b, c</i> (Å)                                  | 61.22, 147.13, 175.17    | 107.11, 130.40, 81.18    |
| $\alpha, \beta, \gamma$ (°)                         | 90.000, 90.000, 90.000   | 90.000, 106.53, 90.000   |
| Resolution (Å)                                      | 73.56-2.70 (2.85-2.70)   | 51.34-3.45 (3.64-3.45)   |
| <i>R</i> <sub>merge</sub>                           | 0.088 (0.482)            | 0.0112 (0.439)           |
| <i>I</i> / $\sigma$ <i>I</i>                        | 18.5 (3.8)               | 7.8 (2.7)                |
| Completeness (%)                                    | 99.5 (100.0)             | 99.4 (99.9)              |
| Redundancy                                          | 6.6 (6.8)                | 3.8 (3.7)                |
| <b>Refinement</b>                                   |                          |                          |
| Resolution (Å)                                      | 73.56 -2.70              | 51.34 -3.45              |
| No. reflections                                     | 145182 (21768)           | 52467 (7842)             |
| No. uniq reflections                                | 22056 (3181)             | 14048 (2066)             |
| <i>R</i> <sub>work</sub> / <i>R</i> <sub>free</sub> | 0.205/0.261              | 0.214/0.262              |
| No. atoms                                           | 3329                     | 5024                     |
| Protein                                             | 3256                     | 5024                     |
| Ligand/ion                                          | 0/0                      | 0/0                      |
| Water                                               | 73                       | 0                        |
| B-factors                                           |                          |                          |
| Protein                                             | 74.625                   | 110.313                  |
| Ligand/ion                                          | 0/0                      | 0/0                      |
| Water                                               | 63.849                   | /                        |
| R.m.s deviations                                    |                          |                          |
| Bond lengths (Å)                                    | 0.007                    | 0.004                    |
| Bond angles (°)                                     | 1.202                    | 0.967                    |
| <b>Ramachandran plot #</b>                          |                          |                          |
| Most favoured regions [%]                           | 91                       | 88.3                     |
| Additional allowed regions                          | 9                        | 11.7                     |
| Generously allowed regions                          | 0                        | 0                        |
| Disallowed regions [%]                              | 0                        | 0                        |

- Highest resolution shell is shown in parenthesis

- # Calculated by Procheck
